# Supplementary material for: PET/MRI-Evaluated Activation of Brown Adipose Tissue via Cold Exposure Impacts Lipid Metabolism
Source: MDPI journal article supplement (doi:10.3390/metabo12050456), 2022-05-19
Supplement: s1 [file s1]

**Supplementary materials to:**

## **PET/MRI-evaluated activation of brown adipose tissue via cold exposure impacts lipid metabolism**

**Katarzyna Miniewska<sup>1,\*</sup>, Katarzyna Maliszewska<sup>2</sup>, Karolina Pietrowska<sup>1</sup>, Joanna Godzien<sup>1</sup>, Łukasz Łabieniec<sup>3</sup>, Małgorzata Mojsak<sup>4</sup>, Adam Krętowski<sup>2,5</sup>, Michał Ciborowski<sup>1,\*</sup>**

<sup>1</sup> Laboratory of Metabolomics, Clinical Research Centre, Medical University of Białystok, Marii Skłodowskiej-Curie 24A, 15-276 Białystok, Poland; karolina.pietrowska@umb.edu.pl (K.P.); joanna.godzien@umb.edu.pl (J.G.)

<sup>2</sup> Department of Endocrinology, Diabetology and Internal Medicine, Medical University of Białystok, Marii Skłodowskiej-Curie 24A, 15-276 Białystok, Poland; katarzyna.maliszewska@umb.edu.pl (K.Ma.); adam.kretowski@umb.edu.pl (A.K.)

<sup>3</sup> Department of Condensed Matter Physics, University of Białystok, Konstantego Ciołkowskiego 1L, 15-245 Białystok, Poland; lukaszlabieniec@gmail.com (Ł.Ł.)

<sup>4</sup> Independent Laboratory of Molecular Imaging, Medical University of Białystok, Zurawia 71A, 15-540, Białystok, Poland; malgorzata.mojsak@umb.edu.pl (M.M.)

<sup>5</sup> Clinical Research Centre, Medical University of Białystok, Marii Skłodowskiej-Curie 24A, 15-276 Białystok, Poland

\* Correspondence: katarzyna.miniewska@umb.edu.pl (K.Mi.); michal.ciborowski@umb.edu.pl (M.C.)

Table S1. Plasma metabolites discriminating samples collected during cold exposure from the samples collected at the beginning of the procedure.

| Metabolite                               | Percentage of change                  |                                       |                                       |                                       |
|------------------------------------------|---------------------------------------|---------------------------------------|---------------------------------------|---------------------------------------|
|                                          | 60 minutes of CE vs. before CE        |                                       | 120 minutes of CE vs. before CE       |                                       |
|                                          | BAT (+)<br>(absolute<br>p(corr); VIP) | BAT (-)<br>(absolute<br>p(corr); VIP) | BAT (+)<br>(absolute<br>p(corr); VIP) | BAT (-)<br>(absolute<br>p(corr); VIP) |
| <b>L2 annotations</b>                    |                                       |                                       |                                       |                                       |
| <b>A, Phospholipids</b>                  |                                       |                                       |                                       |                                       |
| LPC(16:0) sn-2                           | NS                                    | NS                                    | -9.8 (0.4; 1.3)                       | 2.2 (NS)                              |
| LPC(16:0) sn-1                           | NS                                    | NS                                    | -9.0 (0.5; 1.4)                       | 1.7 (NS)                              |
| LPC(17:0)                                | 61.4 (0.5; 2.4)                       | 4.7 (NS)                              | NS                                    | NS                                    |
| LPC(18:0)                                | -27.5 (0.4; 2.6)                      | -11.9 (NS)                            | -15.6 (0.5; 1.8)                      | 10.9 (NS)                             |
| LPC(18:2) sn-2                           | NS                                    | NS                                    | -15.7 (0.5; 1.9)                      | -4.7 (NS)                             |
| LPC(18:2) sn-1                           | NS                                    | NS                                    | -10.8 (0.4; 1.4)                      | -3.7 (NS)                             |
| LPE(16:0)                                | NS                                    | NS                                    | 40.4 (0.4; 2.3)                       | 41.4 (NS)                             |
| LPE(20:4)                                | 93.2 (0.4; 2.5)                       | 10.5 (NS)                             | 18.1 (0.4; 1.5)                       | 13.1 (NS)                             |
| LPE(22:4)                                | NS                                    | NS                                    | 34.3 (0.4; 1.9)                       | 11.6 (NS)                             |
| LPE(22:6)                                | NS                                    | NS                                    | 29.2 (0.4; 1.8)                       | -1.4 (NS)                             |
| <b>B, Other metabolites</b>              |                                       |                                       |                                       |                                       |
| Citric acid                              | NS                                    | NS                                    | 22.9 (0.4; 1.7)                       | 26.6 (NS)                             |
| Lactic acid                              | -26.6 (0.5; 2.7)                      | -6.8 (NS)                             | -22.2 (0.5; 2.3)                      | -9.6 (NS)                             |
| Sphinganine-phosphate                    | -40.4 (0.8; 4.0)                      | -10.5 (NS)                            | -31.9 (0.7; 3.2)                      | -1.7 (NS)                             |
| <b>L2/L3 annotations</b>                 |                                       |                                       |                                       |                                       |
| (d18:2) sphingosine                      | -26.6 (0.7; 2.9)                      | -14.9 (NS)                            | -17.1 (0.5; 2.0)                      | 2.9 (NS)                              |
| Arachidonic acid                         | 43.6 (0.4; 2.3)                       | 29.3 (NS)                             | 68.7 (0.6; 3.2)                       | 40.7 (NS)                             |
| Cholic acid                              | -12.9 (0.4; 3.2)                      | 35.4 (NS)                             | -58.3 (0.7; 5.2)                      | -31.2 (NS)                            |
| DHA                                      | 42.2 (0.4; 2.2)                       | 6.1 (NS)                              | 55.8 (0.5; 2.6)                       | 15.5 (NS)                             |
| Hydroxyoctadecanoic acid<br>(FA 18:0-OH) | 13.4 (0.5; 1.4)                       | 11.8 (NS)                             | 13.1 (0.5; 1.4)                       | 7.2 (NS)                              |
| Linoleic acid                            | NS                                    | NS                                    | 37.1 (0.5; 2.3)                       | 7.9 (NS)                              |
| LPA(O-18:3);O                            | -32.6 (0.6; 3.1)                      | -21.5 (NS)                            | -27.7 (0.6; 2.8)                      | -22.3 (NS)                            |
| Oleic acid                               | NS                                    | NS                                    | 28.4 (0.5; 1.8)                       | 2.6 (NS)                              |
| Palmitic acid                            | 25.3 (0.5; 2.0)                       | 16.3 (NS)                             | 27.0 (0.6; 2.0)                       | 27.9 (NS)                             |
| Sphingosine-1-phosphate                  | -32.4 (0.7; 3.4)                      | -8.8 (NS)                             | NS                                    | NS                                    |

Table S2. Plasma metabolites discriminating BAT(+) group from BAT(-) group after 60 and 120 minutes of cold exposure.

| Metabolite                   | Percentage of change                                               |                                                                     |
|------------------------------|--------------------------------------------------------------------|---------------------------------------------------------------------|
|                              | 60 minutes of CE<br>BAT (+) vs. BAT (-)<br>(absolute p(corr); VIP) | 120 minutes of CE<br>BAT (+) vs. BAT (-)<br>(absolute p(corr); VIP) |
| <b>L2 annotations</b>        |                                                                    |                                                                     |
| <b>A, Phospholipids</b>      |                                                                    |                                                                     |
| LPC(16:0) sn-2               | NS                                                                 | -22.0 (0.5; 1.9)                                                    |
| LPC(16:0) sn-1               | NS                                                                 | -10.3 (0.5; 1.1)                                                    |
| LPC(16:1)                    | -9.9 (0.4; 1.8)                                                    | NS                                                                  |
| LPC(17:0)                    | -11.7 (0.5; 2.0)                                                   | NS                                                                  |
| LPC(18:0) sn-2               | 34.6 (0.4; 1.4)                                                    | -21.2 (0.5; 2.0)                                                    |
| LPC(18:0) sn-1               | -22.1 (0.4; 1.3)                                                   | -15.4 (0.4; 1.6)                                                    |
| LPC(18:1)                    | -12.6 (0.4; 1.3)                                                   | NS                                                                  |
| LPC(20:1)                    | NS                                                                 | -22.8 (0.4; 1.8)                                                    |
| LPC(20:2)                    | NS                                                                 | -19.9 (0.4; 1.6)                                                    |
| LPC(20:5)                    | NS                                                                 | -46.3 (0.4; 2.3)                                                    |
| LPC(O-16:0)                  | -13.8 (0.4; 1.5)                                                   | -18.0 (0.5; 1.6)                                                    |
| LPC(O-18:1) /<br>LPC(P-18:0) | NS                                                                 | -25.7 (0.4; 1.8)                                                    |
| LPE(O-16:1) /<br>LPE(P-16:0) | NS                                                                 | -26.6 (0.5; 2.2)                                                    |
| LPE(O-18:0)                  | 43.4 (0.5; 1.8)                                                    | NS                                                                  |
| LPE(O-18:1) /<br>LPE(P-18:0) | NS                                                                 | -22.4 (0.4; 1.8)                                                    |
| LPE(O-18:2) /<br>LPE(P-18:1) | NS                                                                 | -28.3 (0.5; 2.1)                                                    |
| PC(36:3)                     | NS                                                                 | -24.1 (0.6; 2.0)                                                    |
| SM(d35:1)                    | NS                                                                 | 31.2 (0.5; 1.8)                                                     |
| SM(d42:2)                    | NS                                                                 | 24.8 (0.4; 2.0)                                                     |
| <b>B, Other metabolites</b>  |                                                                    |                                                                     |
| 9-HpODE                      | 66.9 (0.5; 2.2)                                                    | 61.0 (0.6; 2.6)                                                     |
| Acetylcarnitine              | NS                                                                 | 28.5 (0.4; 2.0)                                                     |
| <b>L2/L3 annotations</b>     |                                                                    |                                                                     |
| Hexacosanedioic acid         | NS                                                                 | -29.3 (0.4; 1.8)                                                    |
| Hydroxyoctadecanoic acid     | 39.4 (0.5; 1.7)                                                    | 21.9 (0.6; 1.8)                                                     |
| Linoleic acid                | 37.1 (0.6; 3.4)                                                    | NS                                                                  |
| Oleic acid                   | 19.3 (0.5; 2.5)                                                    | 59.7 (0.7; 3.1)                                                     |
| Palmitic acid                | 35.1 (0.6; 2.5)                                                    | 29.6 (0.7; 3.6)                                                     |

Table S3. Annotation of plasma metabolites significantly associated with BAT activation

| Metabolite                       | RT (min) | Fragments                                                                                                 |
|----------------------------------|----------|-----------------------------------------------------------------------------------------------------------|
| <b>A, Lipids</b>                 |          |                                                                                                           |
| <b>LPA(O-18:3);O</b>             | 6.1      | N: 433.235, 152.996, 78.959                                                                               |
| <b>LPC(14:0)</b>                 | 5.0      | N: 512.299, 452.279, 227.202, 224.071<br>P: 468.308, 450.297, 184.073, 166.034, 125.000, 104.107          |
| <b>LPC(15:0)</b>                 | 5.2      | N: 526.315, 466.294, 241.217, 224.069, 168.041<br>P: 482.323, 464.312, 184.073, 166.061, 124.998, 104.107 |
| <b>LPC(16:0) sn-2</b>            | 5.5      | N: 540.331, 480.309, 255.233<br>P: 496.340, 184.073                                                       |
| <b>LPC(16:0) sn-1</b>            | 5.6      | N: 540.331, 480.311, 255.233, 224.070, 168.043<br>P: 496.340, 184.073, 166.062, 125.000, 104.070          |
| <b>LPC(16:1) sn-2</b>            | 5.0      | N: 538.315, 478.293, 253.217                                                                              |
| <b>LPC(16:1) sn-1</b>            | 5.2      | N: 538.315, 478.294, 253.217, 224.069, 168.043                                                            |
| <b>LPC(17:0)</b>                 | 5.7      | N: 554.344, 494.326, 269.249, 224.070, 168.042                                                            |
| <b>LPC(17:1)</b>                 | 5.4      | N: 552.330, 492.309, 267.233, 224.069                                                                     |
| <b>LPC(18:0) sn-2</b>            | 6.1      | N: 568.362, 508.342, 283.265, 224.070, 168.043                                                            |
| <b>LPC(18:0) sn-1</b>            | 6.2      | N: 568.362, 508.341, 283.265, 224.067, 168.043                                                            |
| <b>LPC(18:1)</b>                 | 5.8      | N: 566.346, 506.326, 281.249, 224.069, 168.042                                                            |
| <b>LPC(18:2) sn-2</b>            | 5.3      | N: 564.331, 504.310, 279.233, 168.041<br>P: 520.341, 184.073, 166.062, 125.000, 104.107                   |
| <b>LPC(18:2) sn-1</b>            | 5.4      | N: 564.331, 504.312, 279.233, 224.069, 168.043<br>P: 520.341, 502.328, 184.073, 166.062, 125.000, 104.107 |
| <b>LPC(19:0)</b>                 | 6.5      | N: 582.377, 522.359, 297.279, 224.071                                                                     |
| <b>LPC(19:1)</b>                 | 6.0      | N: 580.361, 520.340, 295.265, 224.072                                                                     |
| <b>LPC(20:0)</b>                 | 6.8      | N: 596.393, 536.374, 311.296, 224.070                                                                     |
| <b>LPC(20:1)</b>                 | 6.3      | N: 594.377, 534.356, 309.279, 224.068                                                                     |
| <b>LPC(20:2)</b>                 | 5.9      | N: 592.362, 532.342, 307.264, 224.069                                                                     |
| <b>LPC(20:4)</b>                 | 5.4      | N: 578.301, 528.311, 303.233, 242.083, 168.043                                                            |
| <b>LPC(20:5)</b>                 | 5.1      | N: 586.315, 526.296, 301.217, 224.070                                                                     |
| <b>LPC(O-16:0)</b>               | 5.7      | N: 526.351, 466.330, 224.068, 168.044                                                                     |
| <b>LPC(O-18:1) / LPC(P-18:0)</b> | 5.9      | N: 552.367, 492.346                                                                                       |

|                                              |     |                                                              |
|----------------------------------------------|-----|--------------------------------------------------------------|
| <b>LPC(O-18:2) / LPC(P-18:1)</b>             | 5.9 | N: 550.351, 490.329                                          |
| <b>LPC(16:0)-OH</b>                          | 5.1 | P: 512.334, 184.073, 146.983, 125.000, 104.107               |
| <b>LPE(16:0)</b>                             | 5.5 | N: 452.278, 255.233, 196.038<br>P: 454.292, 313.234, 282.281 |
| <b>LPE(18:0)</b>                             | 6.2 | N: 480.309, 283.265, 214.049, 196.037                        |
| <b>LPE(20:4)</b>                             | 5.4 | N: 500.278, 303.233, 214.049, 196.038                        |
| <b>LPE(22:4)</b>                             | 5.8 | N: 528.309, 331.266, 196.040                                 |
| <b>LPE(22:6)</b>                             | 5.3 | N: 592.265, 524.280, 327.234, 283.244, 196.039               |
| <b>LPE(O-16:1) / LPE(P-16:0)</b>             | 5.7 | N: 436.283, 196.036, 140.012                                 |
| <b>LPE(O-18:0)</b>                           | 5.7 | N: 466.329, 196.038, 168.041                                 |
| <b>LPE(O-18:1) / LPE(P-18:0)</b>             | 6.3 | N: 464.314, 196.037, 140.012                                 |
| <b>LPE(O-18:2) / LPE(P-18:1)</b>             | 5.9 | N: 462.299, 196.038, 140.011                                 |
| <b>LPE(O-20:1) / LPE(P-20:0)</b>             | 5.9 | N: 492.346, 168.041                                          |
| <b>LPI(18:0)</b>                             | 6.8 | N: 599.320, 315.046, 283.264, 241.015, 152.995               |
| <b>PC(16:0_18:3)</b>                         | 9.1 | N: 800.544, 740.524, 277.217, 255.233, 168.042               |
| <b>PC(16:0_22:6)</b>                         | 9.3 | N: 840.532, 790.541, 480.309, 327.232, 283.244, 255.231      |
| <b>PC(36:3)</b>                              | 9.7 | N: 900.506, 116.929                                          |
| <b>PC(36:4)</b>                              | 9.1 | N: 894.547, 112.985                                          |
| <b>PC(36:5)</b>                              | 9.0 | N: 892.532, 112.985<br>P: 780.554, 184.073, 166.058, 125.000 |
| <b>PC(38:5)</b>                              | 9.8 | N: 924.506, 116.928                                          |
| <b>PC(O-16:1_18:2) /<br/>PC(P-16:0_18:2)</b> | 9.9 | N: 786.565, 726.545, 279.232                                 |
| <b>SM(d32:2)</b>                             | 7.4 | N: 717.519, 657.498, 168.043                                 |
| <b>SM(d35:1)</b>                             | 9.0 | N: 761.581, 701.561, 168.043                                 |
| <b>SM(d35:2)</b>                             | 8.5 | N: 759.565, 699.547, 168.043                                 |
| <b>SM(d42:2)</b>                             | 7.5 | P: 835.666, 776.593, 652.598, 184.072, 146.982               |
| <b>B, Other metabolites</b>                  |     |                                                              |
| <b>(d18:2) sphingosine</b>                   | 4.5 | N: 376.225, 78.960                                           |
| <b>9-HpODE</b>                               | 5.4 | N: 311.223, 293.212, 249.221                                 |
| <b>Acetylcarnitine</b>                       | 0.2 | P: 204.124, 145.049, 85.028, 60.081                          |

|                                                           |     |                                              |
|-----------------------------------------------------------|-----|----------------------------------------------|
| <b>Arachidonic acid</b>                                   | 7.0 | N: 303.233, 259.242, 205.197, 59.013         |
| <b>Bilirubin</b>                                          | 4.9 | N: 583.256, 285.125, 253.136                 |
| <b>Cholic acid</b>                                        | 4.2 | N: 407.280                                   |
| <b>DHA</b>                                                | 6.9 | N: 327.233, 283.243, 229.196, 59.014         |
| <b>FA 12:4;O3</b>                                         | 3.5 | N: 239.093, 195.103, 151.113                 |
| <b>Hexacosanedioic acid</b>                               | 7.8 | N: 425.363, 407.353, 363.360                 |
| <b>Hydroxyoctadecanoic acid<br/>(FA 18:0-OH)</b>          | 7.3 | N: 299.259, 253.254                          |
| <b>Histidine</b>                                          | 0.2 | N: 154.062, 137.035, 110.072, 93.045, 72.009 |
| <b>Linoleic acid</b>                                      | 7.0 | N: 279.233                                   |
| <b>Oleic acid</b>                                         | 7.5 | N: 281.249                                   |
| <b>Palmitic acid</b>                                      | 7.4 | N: 255.233                                   |
| <b>Sphingosine-1-phosphate</b>                            | 4.9 | N: 446.228, 378.240, 78.959                  |
| <b>ST 19:1;O2;S<br/>(dihydrotestosterone<br/>sulfate)</b> | 3.9 | N: 367.158, 96.960                           |
